# Supplementary material for: Evolution of the eastward shift in the quasi-stationary minimum of the Antarctic total ozone column
Source: Copernicus journal article supplement (doi:10.5194/acp-17-1741-2017), 2017-02-03
Supplement: Supplementary file 1 [file acp-17-1741-2017-supplement.zip]

Archive with 9 entries (9 files):
- fs07.tif
- fs05.tif
- acp-2016-537_supplement_Rev2_14Jan17-fin.pdf
- fs03.tif
- acp-17-1741-2017-supplement-title-page.pdf
- fs02.tif
- fs06.tif
- fs04.tif
- fs01.tif
