# Supplementary material for: Evolution of the eastward shift in the quasi-stationary minimum of the Antarctic total ozone column
Source: Copernicus journal article supplement (doi:10.5194/acp-17-1741-2017), 2017-02-03
Supplement: Supplementary file 1 [file acp-17-1741-2017-supplement.zip › acp-17-1741-2017-supplement-title-page.pdf]

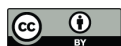

## *Supplement of*

# **Evolution of the eastward shift in the quasi-stationary minimum of the Antarctic total ozone column**

**Asen Grytsai et al.**

*Correspondence to:* Gennadi Milinevsky ([genmilinevsky@gmail.com](mailto:genmilinevsky@gmail.com))

- [acp-17-1741-2017-supplement-title-page.pdf](#)
- [acp-2016-537\\_supplement\\_Rev2\\_14Jan17-fin.pdf](#)
- [fs01.tif](#)
- [fs02.tif](#)
- [fs03.tif](#)
- [fs04.tif](#)
- [fs05.tif](#)
- [fs06.tif](#)
- [fs07.tif](#)

The copyright of individual parts of the supplement might differ from the CC-BY 3.0 licence.
