# Supplementary material for: Evolution of the eastward shift in the quasi-stationary minimum of the Antarctic total ozone column
Source: Copernicus journal article supplement (doi:10.5194/acp-17-1741-2017), 2017-02-03
Supplement: Supplementary file 1 [file acp-17-1741-2017-supplement.zip › acp-2016-537_supplement_Rev2_14Jan17-fin.pdf]

## Evolution of the eastward shift in the quasi-stationary minimum of the Antarctic total ozone column

A. Grytsai et al.

Correspondence to: G. P. Milinevsky (genmilinevsky@gmail.com)

**Supplement 1.** Calculations of the long-term tendencies for timeseries presented in Fig. 2. Polynomial approximation was calculated with a least-squares method by a following scheme (see, e.g. Krishnan, V.: Probability and random processes, John Wiley & Sons, Inc., Hoboken, New Jersey, 420 p., 2006). We consider  $n$  pairs of values  $(x_i, y_i)$ . In our calculations  $x_i$  and  $y_i$  are time and the phase of the TOC distribution (e.g. in the quasi-stationary minimum at 65°S), respectively. The purpose is to find a polynomial fit of degree  $k$  to minimize

$$f(x_i, y_i) = \sum_{i=1}^n (P_k(x_i) - y_i)^2$$

where

$$P_k(x_i) = \sum_{m=0}^k a_m x_i^m$$

is a polynomial of  $k$ -th power with unknown coefficients  $a_j$ . The minimization condition for the function  $f$  is written as

$$\frac{\partial f}{\partial a_j} = 0,$$

which includes a system from  $k + 1$  equations for different  $j$ . In solving the system we obtain each coefficient as the ratio of the two determinants:

$$a_m = \frac{\begin{vmatrix} n & \sum_{i=1}^n x_i & \dots & \sum_{i=1}^n x_i^{m-1} & \sum_{i=1}^n y_i & \dots & \sum_{i=1}^n x_i^k \\ \dots & \dots & \dots & \dots & \dots & \dots & \dots \\ \sum_{i=1}^n x_i^k & \sum_{i=1}^n x_i^{k+1} & \dots & \sum_{i=1}^n x_i^{k+m-1} & \sum_{i=1}^n x_i^k y_i & \dots & \sum_{i=1}^n x_i^{2k} \end{vmatrix}}{\begin{vmatrix} n & \sum_{i=1}^n x_i & \dots & \sum_{i=1}^n x_i^{m-1} & \sum_{i=1}^n x_i^m & \dots & \sum_{i=1}^n x_i^k \\ \dots & \dots & \dots & \dots & \dots & \dots & \dots \\ \sum_{i=1}^n x_i^k & \sum_{i=1}^n x_i^{k+1} & \dots & \sum_{i=1}^n x_i^{k+m-1} & \sum_{i=1}^n x_i^{k+m} & \dots & \sum_{i=1}^n x_i^{2k} \end{vmatrix}}$$

**Supplement 2.** Polynomial fits for the timeseries of the QSW minimum longitude at 65°S in comparison with Fig. 2b ( $k = 3$ ).

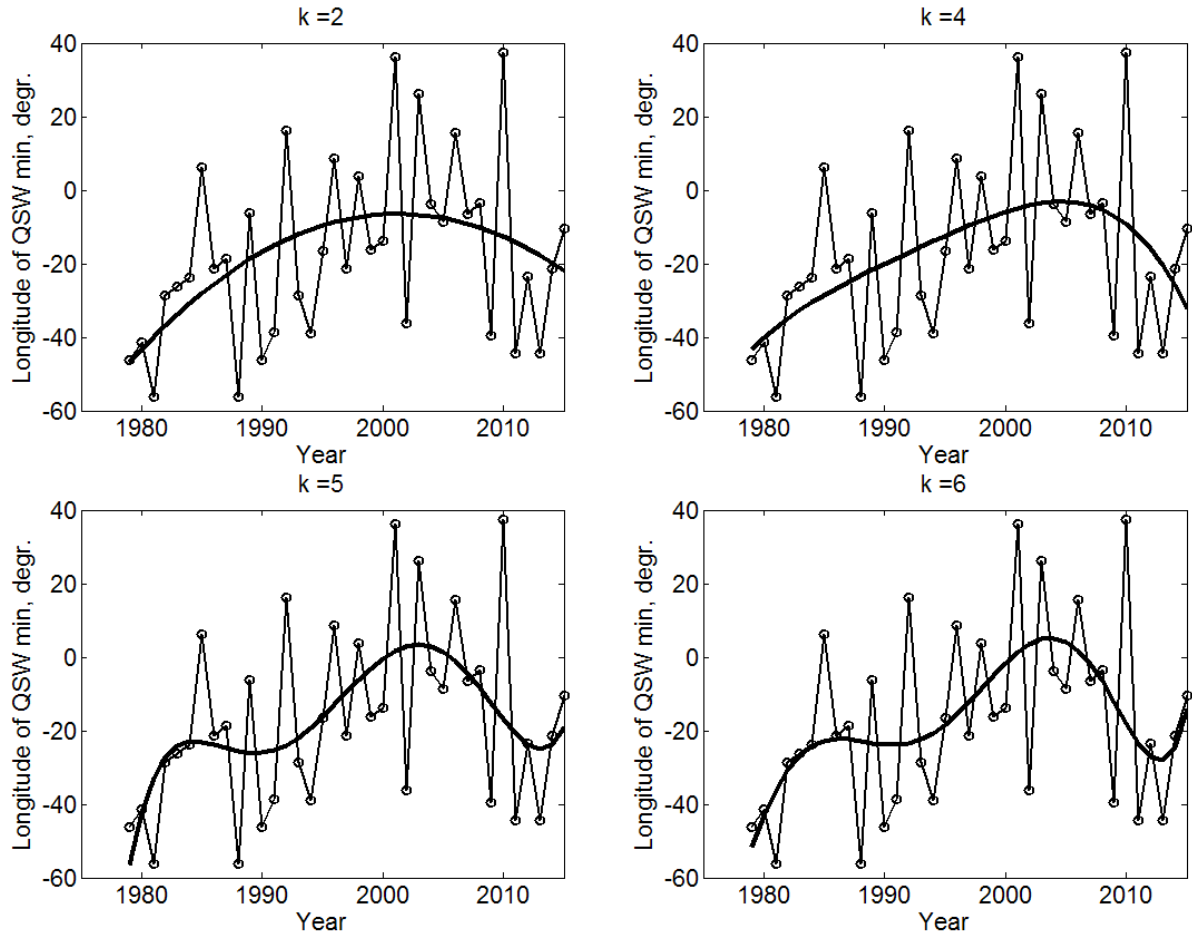

**Figure S1:** Longitude of the QSW minimum at 65°S averaged for September–November. Thin lines are timeseries of 1979–2015 and thick lines are polynomial fits of degree  $k = 2, 4–6$ .

**Supplement 3.** Images in Figs. S2–S6 based on data by the NOAA/ESRL Physical Sciences Division, Boulder Colorado from their Web site at <http://www.esrl.noaa.gov/psd/>.

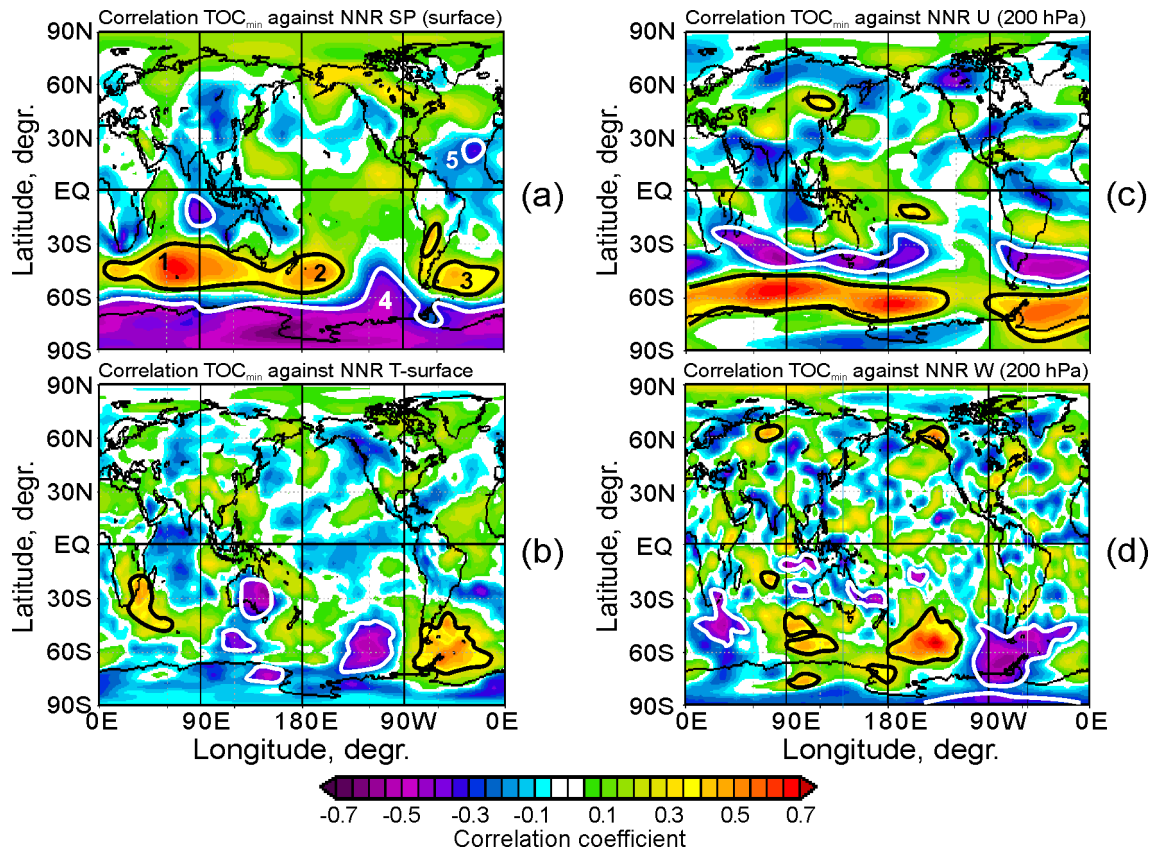

**Figure S2:** Correlations between the TOC QSW minimum longitude against NCEP–NCAR reanalysis climatological anomalies of (a) surface pressure (SP), (b) surface temperature, (c) 200-hPa zonal wind speed (U200) and (d) 200-hPa vertical pressure wind speed (W200) for SON 1979–2014. Black (white) contours show positive (negative) correlations significant at the 95% confidence limit. To compare with Fig. 6 based on the the ERA-Interim data.

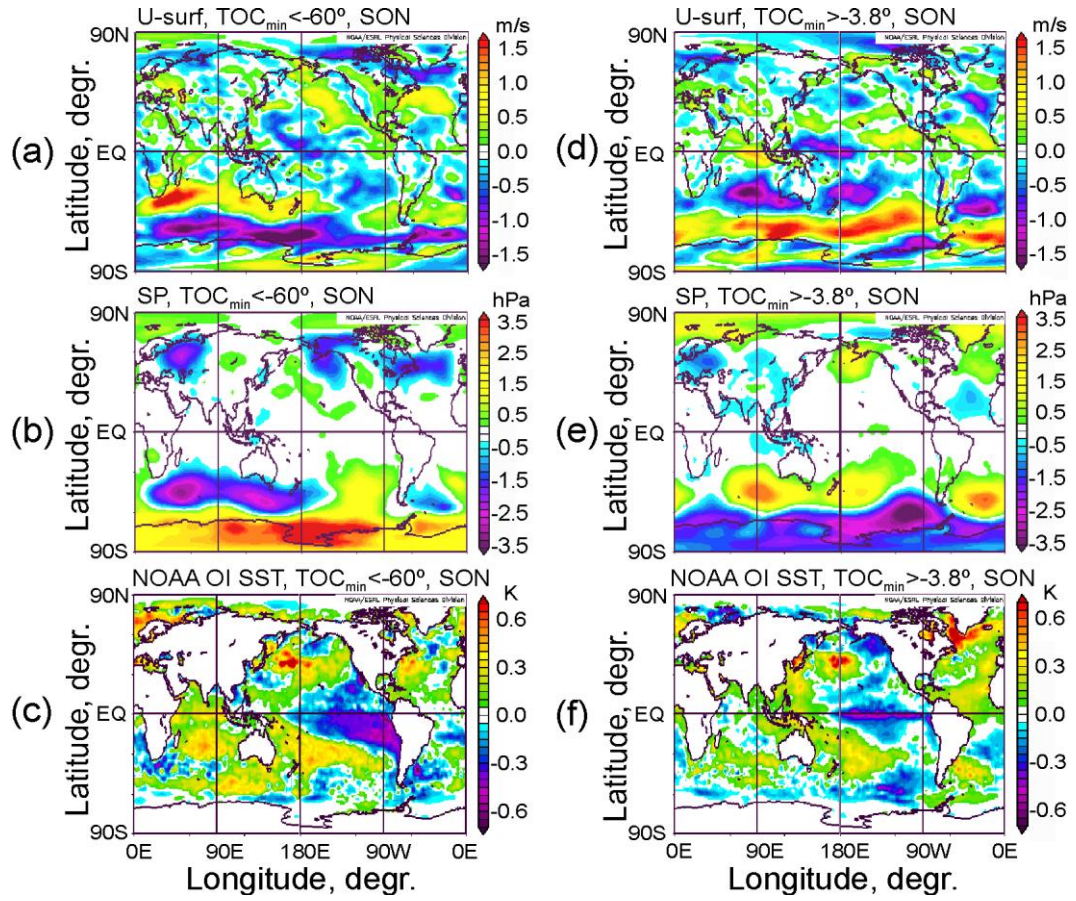

**Figure S3:** As in Fig. 7, but for the NCEP–NCAR reanalysis.

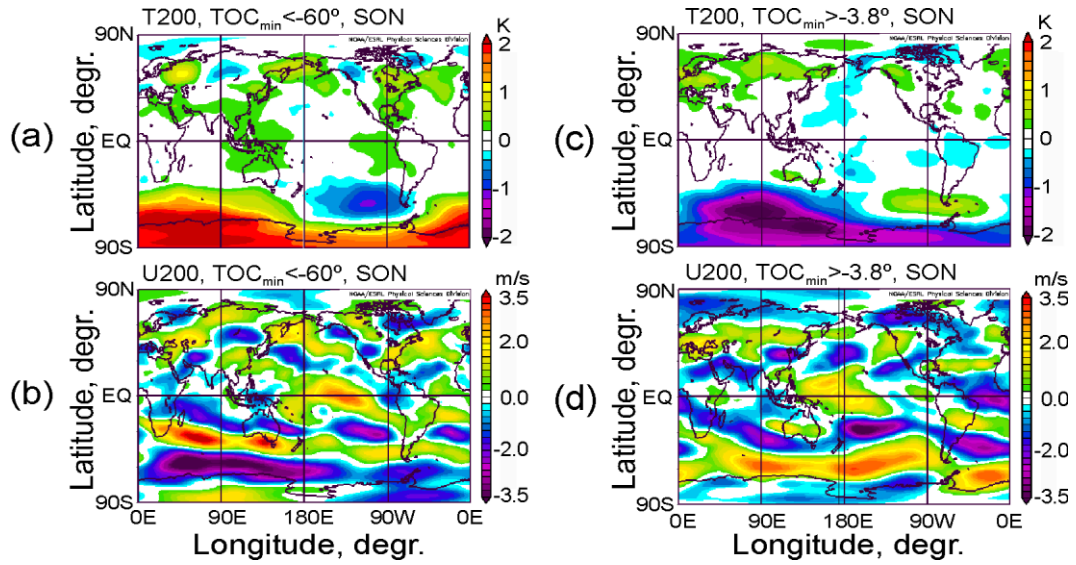

**Figure S4:** As in Fig. 9a, 9b, 9e and 9f, but for the NCEP–NCAR reanalysis.

Figs S5 and S6 show correlations between the QSW<sub>min</sub> longitude and NCEP–NCAR air temperature to compare with those from the ERA-Interim data presented in Fig. 10 and Fig. 11, respectively.

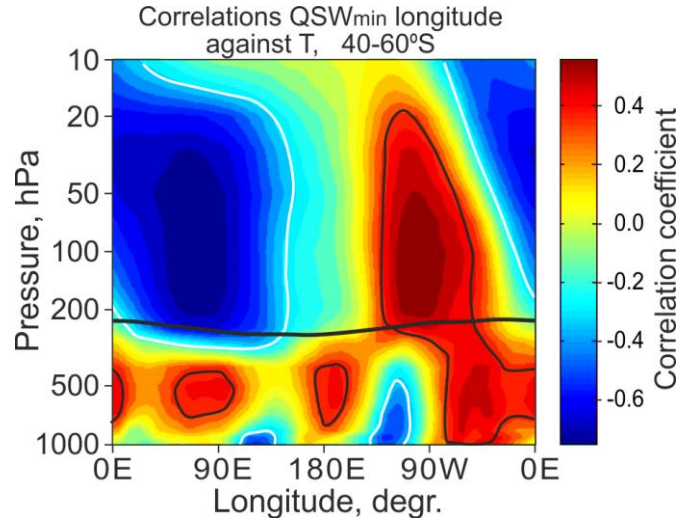

**Figure S5:** Longitude–height cross-section of the correlation between the QSW<sub>min</sub> longitude at 65°S and air temperature averaged over the zone 40–60°S for SON 1979–2014. Thick black curve marks climatological thermal tropopause from the NCEP–NCAR reanalysis. Black (white) contours show positive (negative) correlations significant at the 95% confidence limit.

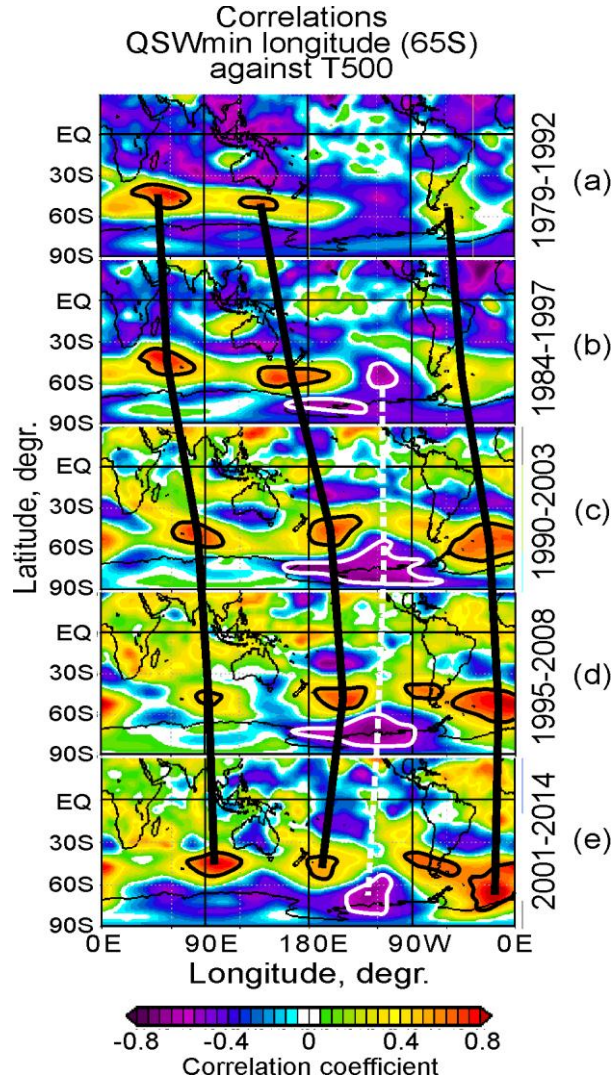

**Figure S6:** Correlation between the QSW<sub>min</sub> longitude at 65°S and air temperature at 500 hPa south of 30°N. Five sequential 14-year intervals with 5–6 year step are presented. Black (white) contours show positive (negative) correlations significant at the 95% confidence limit. Thick solid black (dashed white) lines mark mean longitudinal positions of the positive (negative) correlation peaks in the QSW3 structure.

Fig. S7 shows the meridional cross-section of the linear correlation between temperature and  $QSW_{min}$  longitude from the ACCESS-CCM REF-C2 and REF-C1 simulations.

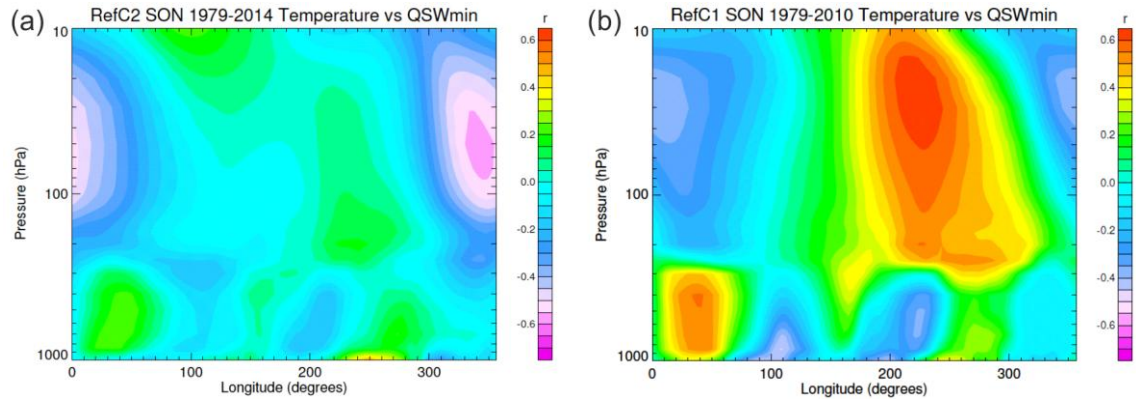

**Figure S7:** Similar to Fig. 10, but showing the longitude–height cross-section of the correlation between the  $QSW_{min}$  longitude at 65°S and air temperature averaged over the zone 40–60°S for (a) the REF-C2 simulation over 1979–2014 and (b) the REF-C1 simulation over 1979–2010.
