# Supplementary figures and images for: Evolution of the eastward shift in the quasi-stationary minimum of the Antarctic total ozone column
Source: Copernicus journal article supplement (doi:10.5194/acp-17-1741-2017), 2017-02-03

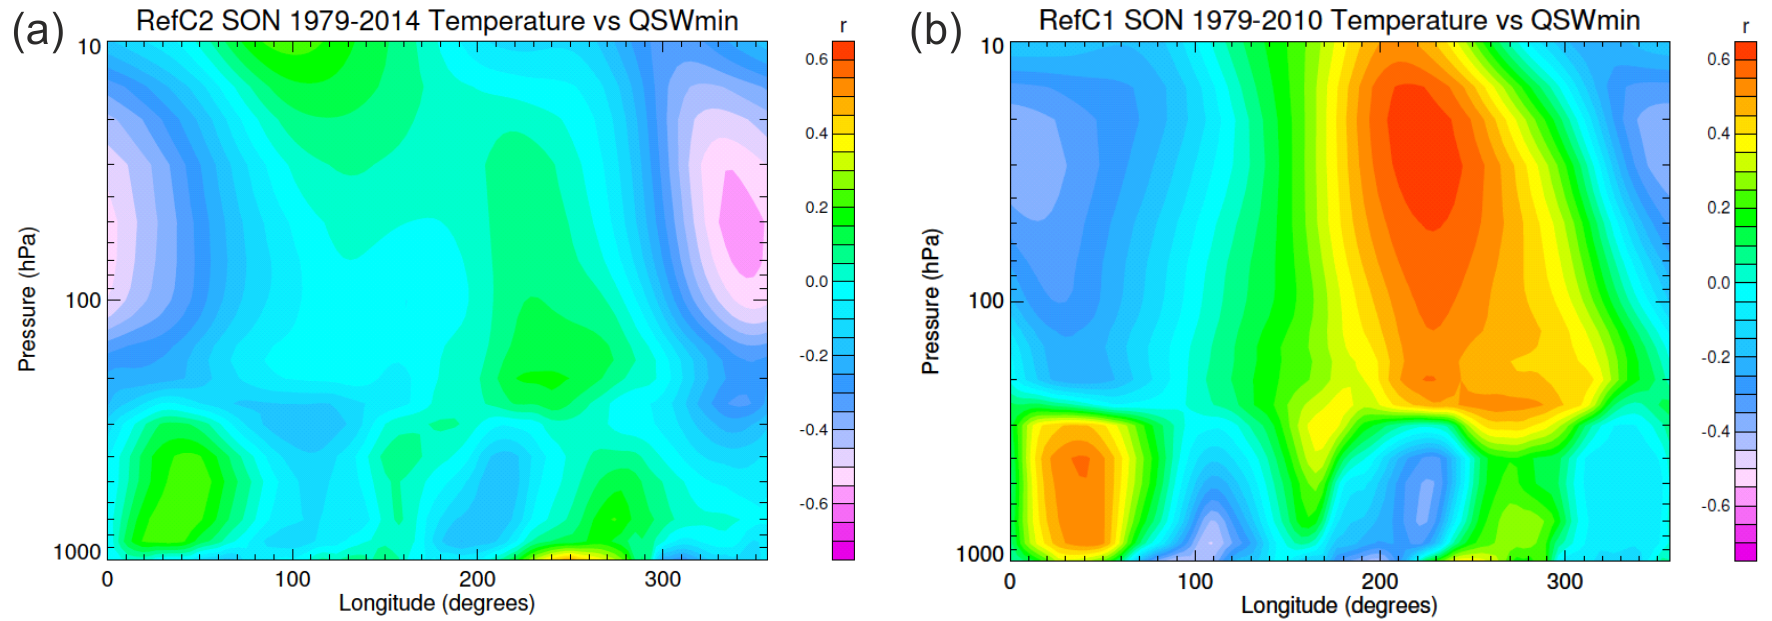

Supplement: Supplementary file 1 [file acp-17-1741-2017-supplement.zip › fs07.tif]

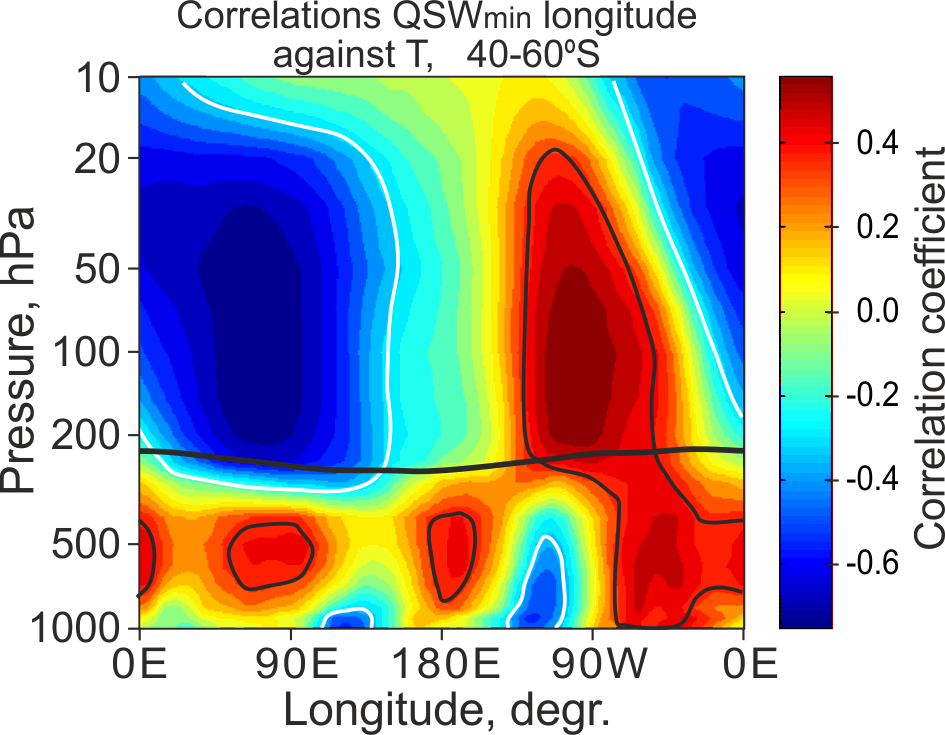

Supplement: Supplementary file 1 [file acp-17-1741-2017-supplement.zip › fs05.tif]

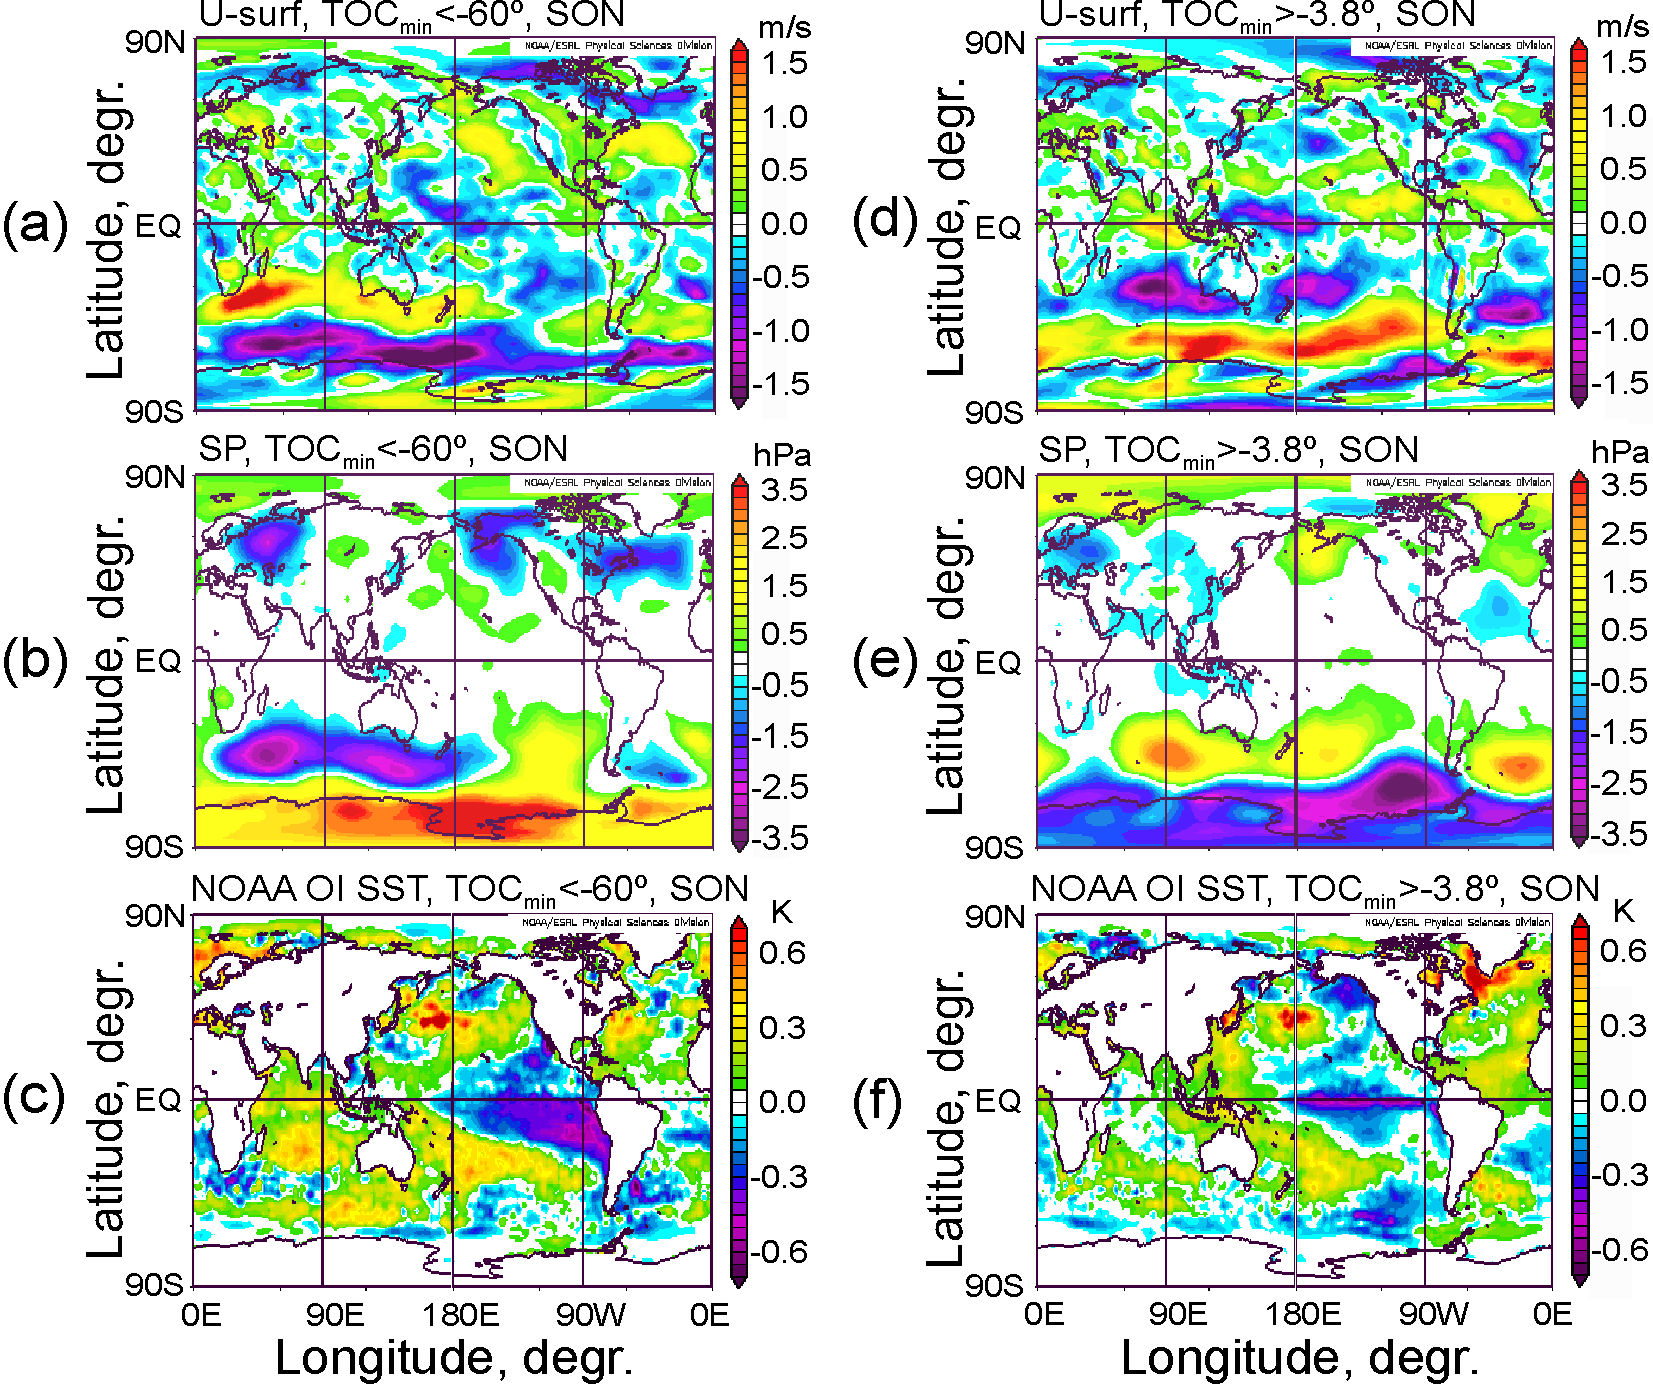

Supplement: Supplementary file 1 [file acp-17-1741-2017-supplement.zip › fs03.tif]

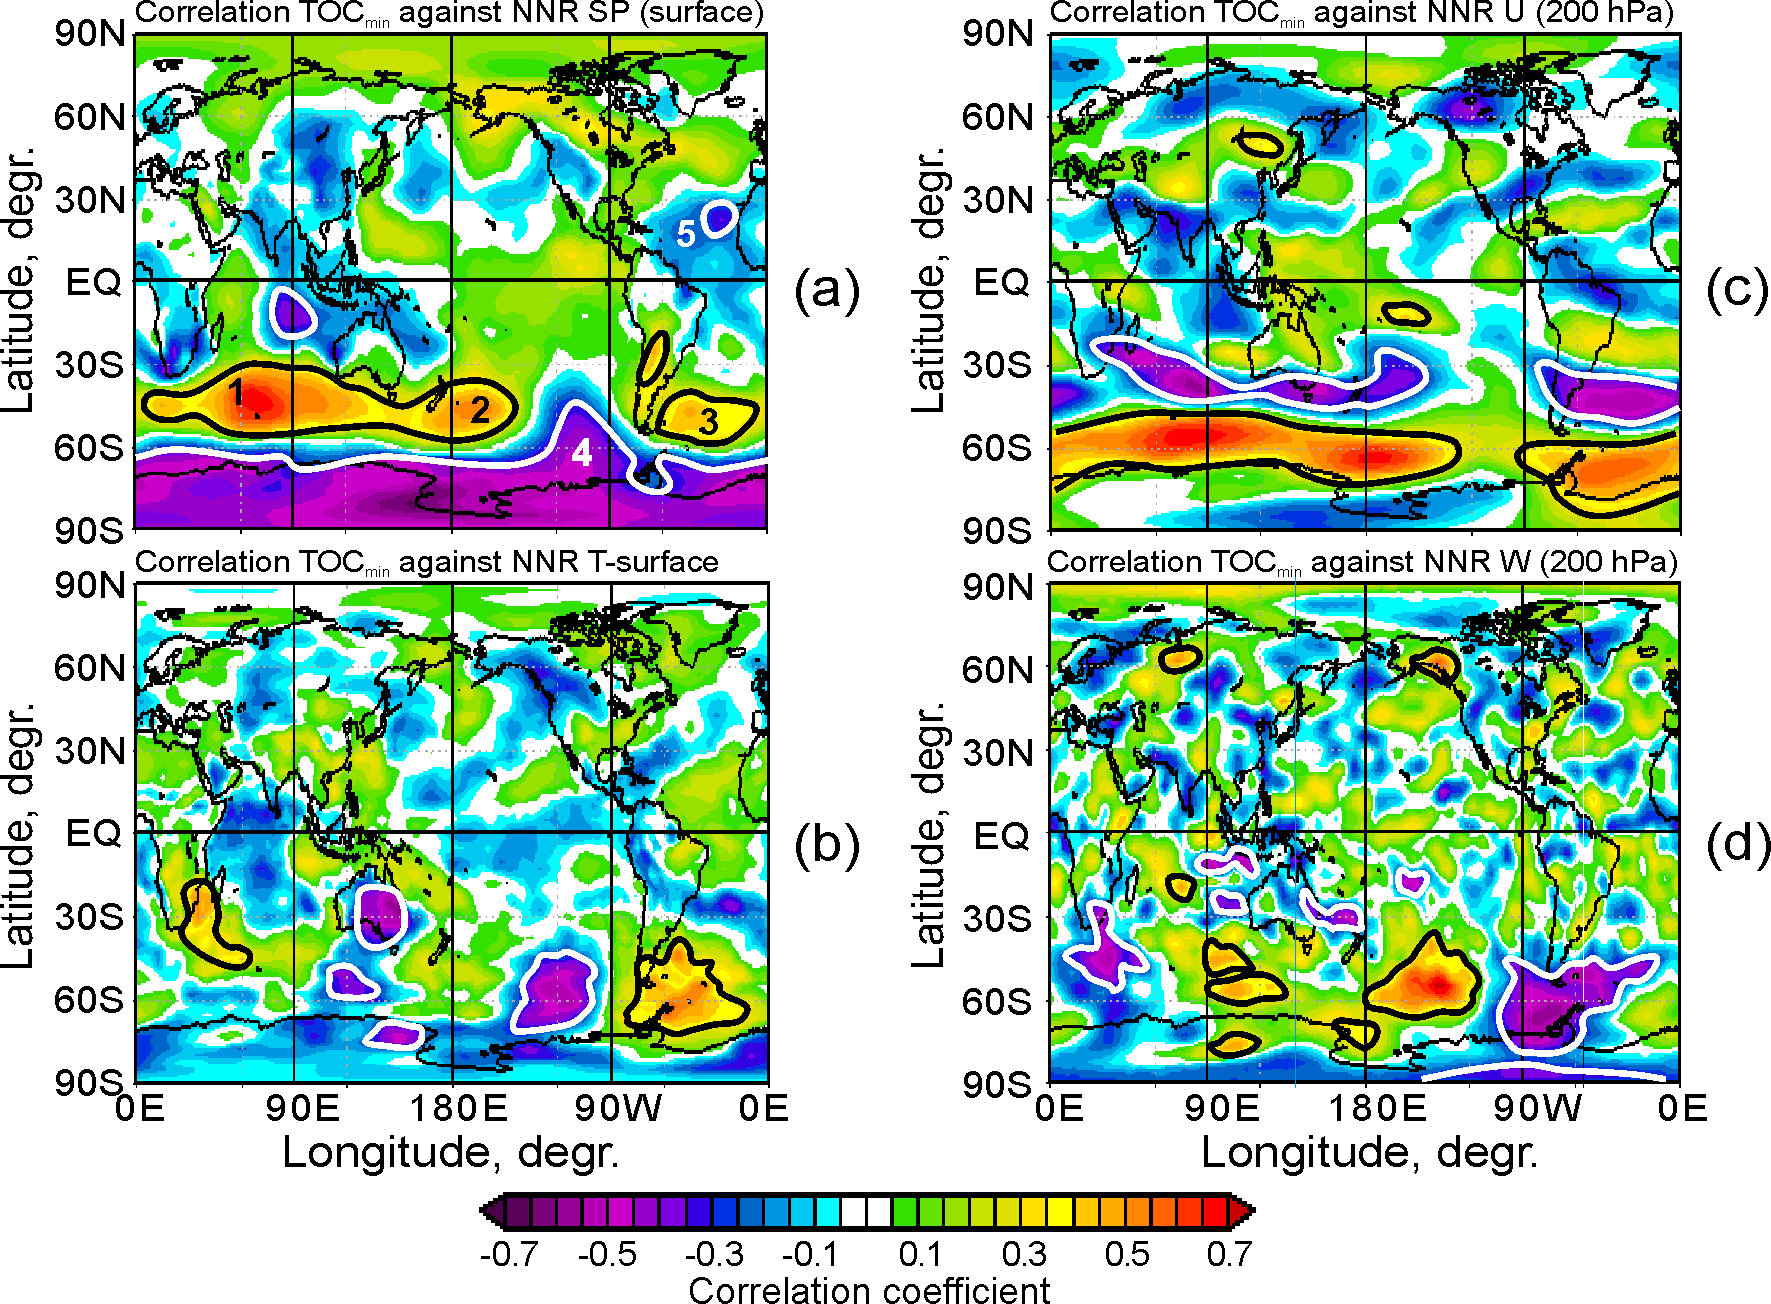

Supplement: Supplementary file 1 [file acp-17-1741-2017-supplement.zip › fs02.tif]

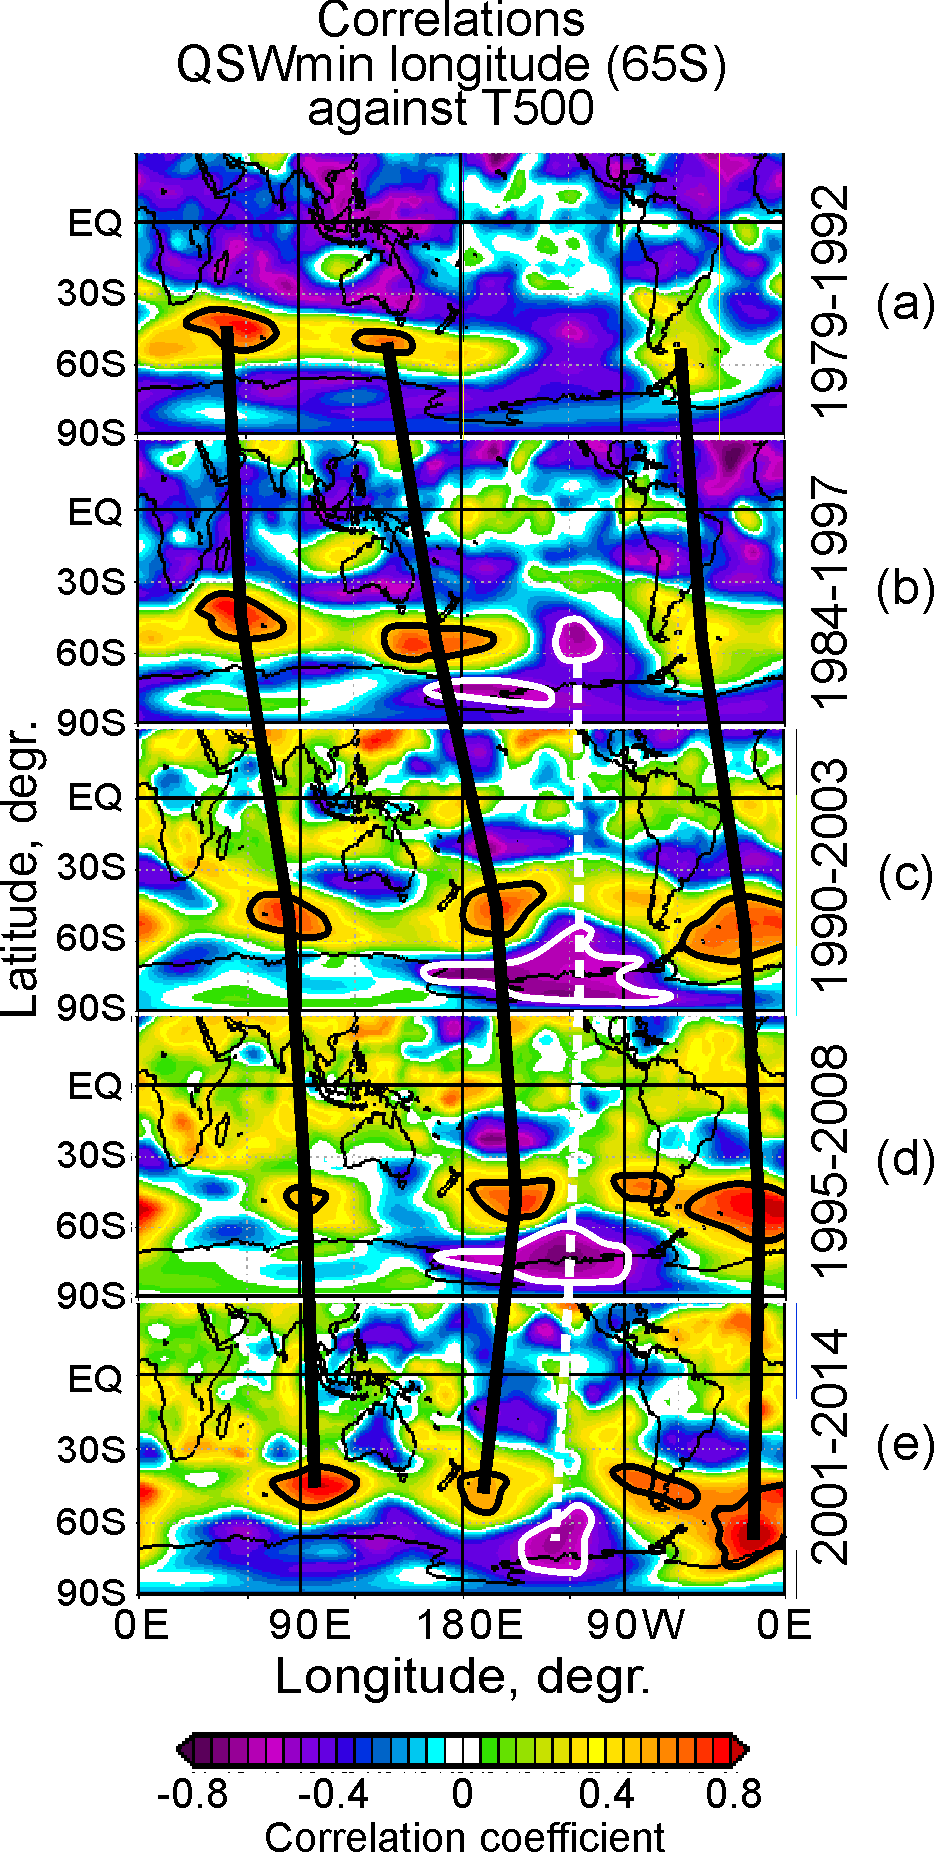

Supplement: Supplementary file 1 [file acp-17-1741-2017-supplement.zip › fs06.tif]

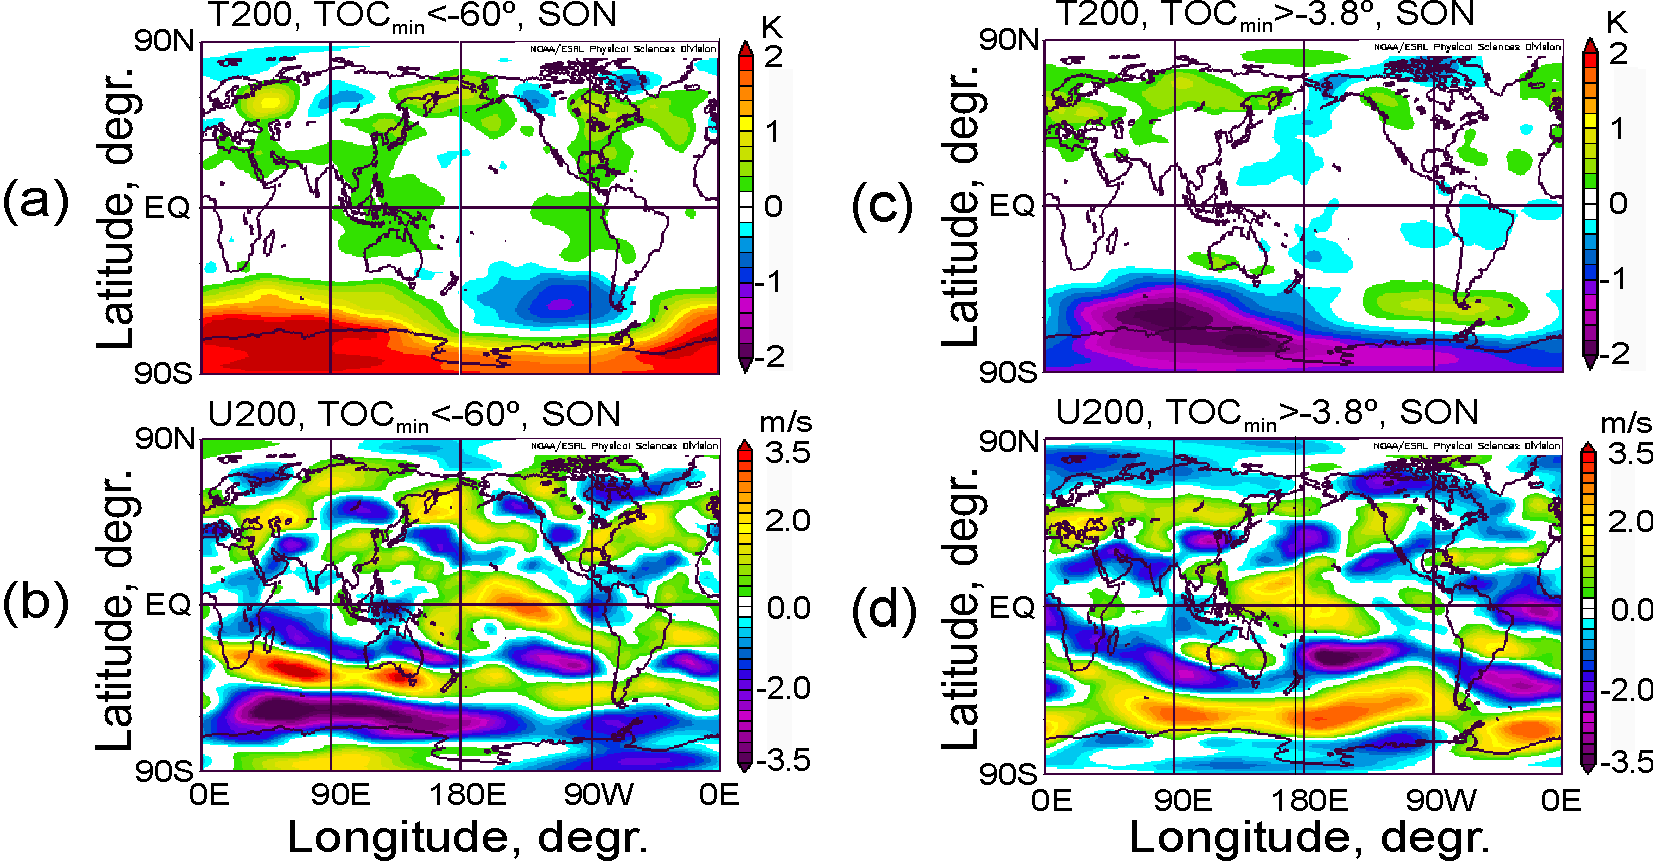

Supplement: Supplementary file 1 [file acp-17-1741-2017-supplement.zip › fs04.tif]

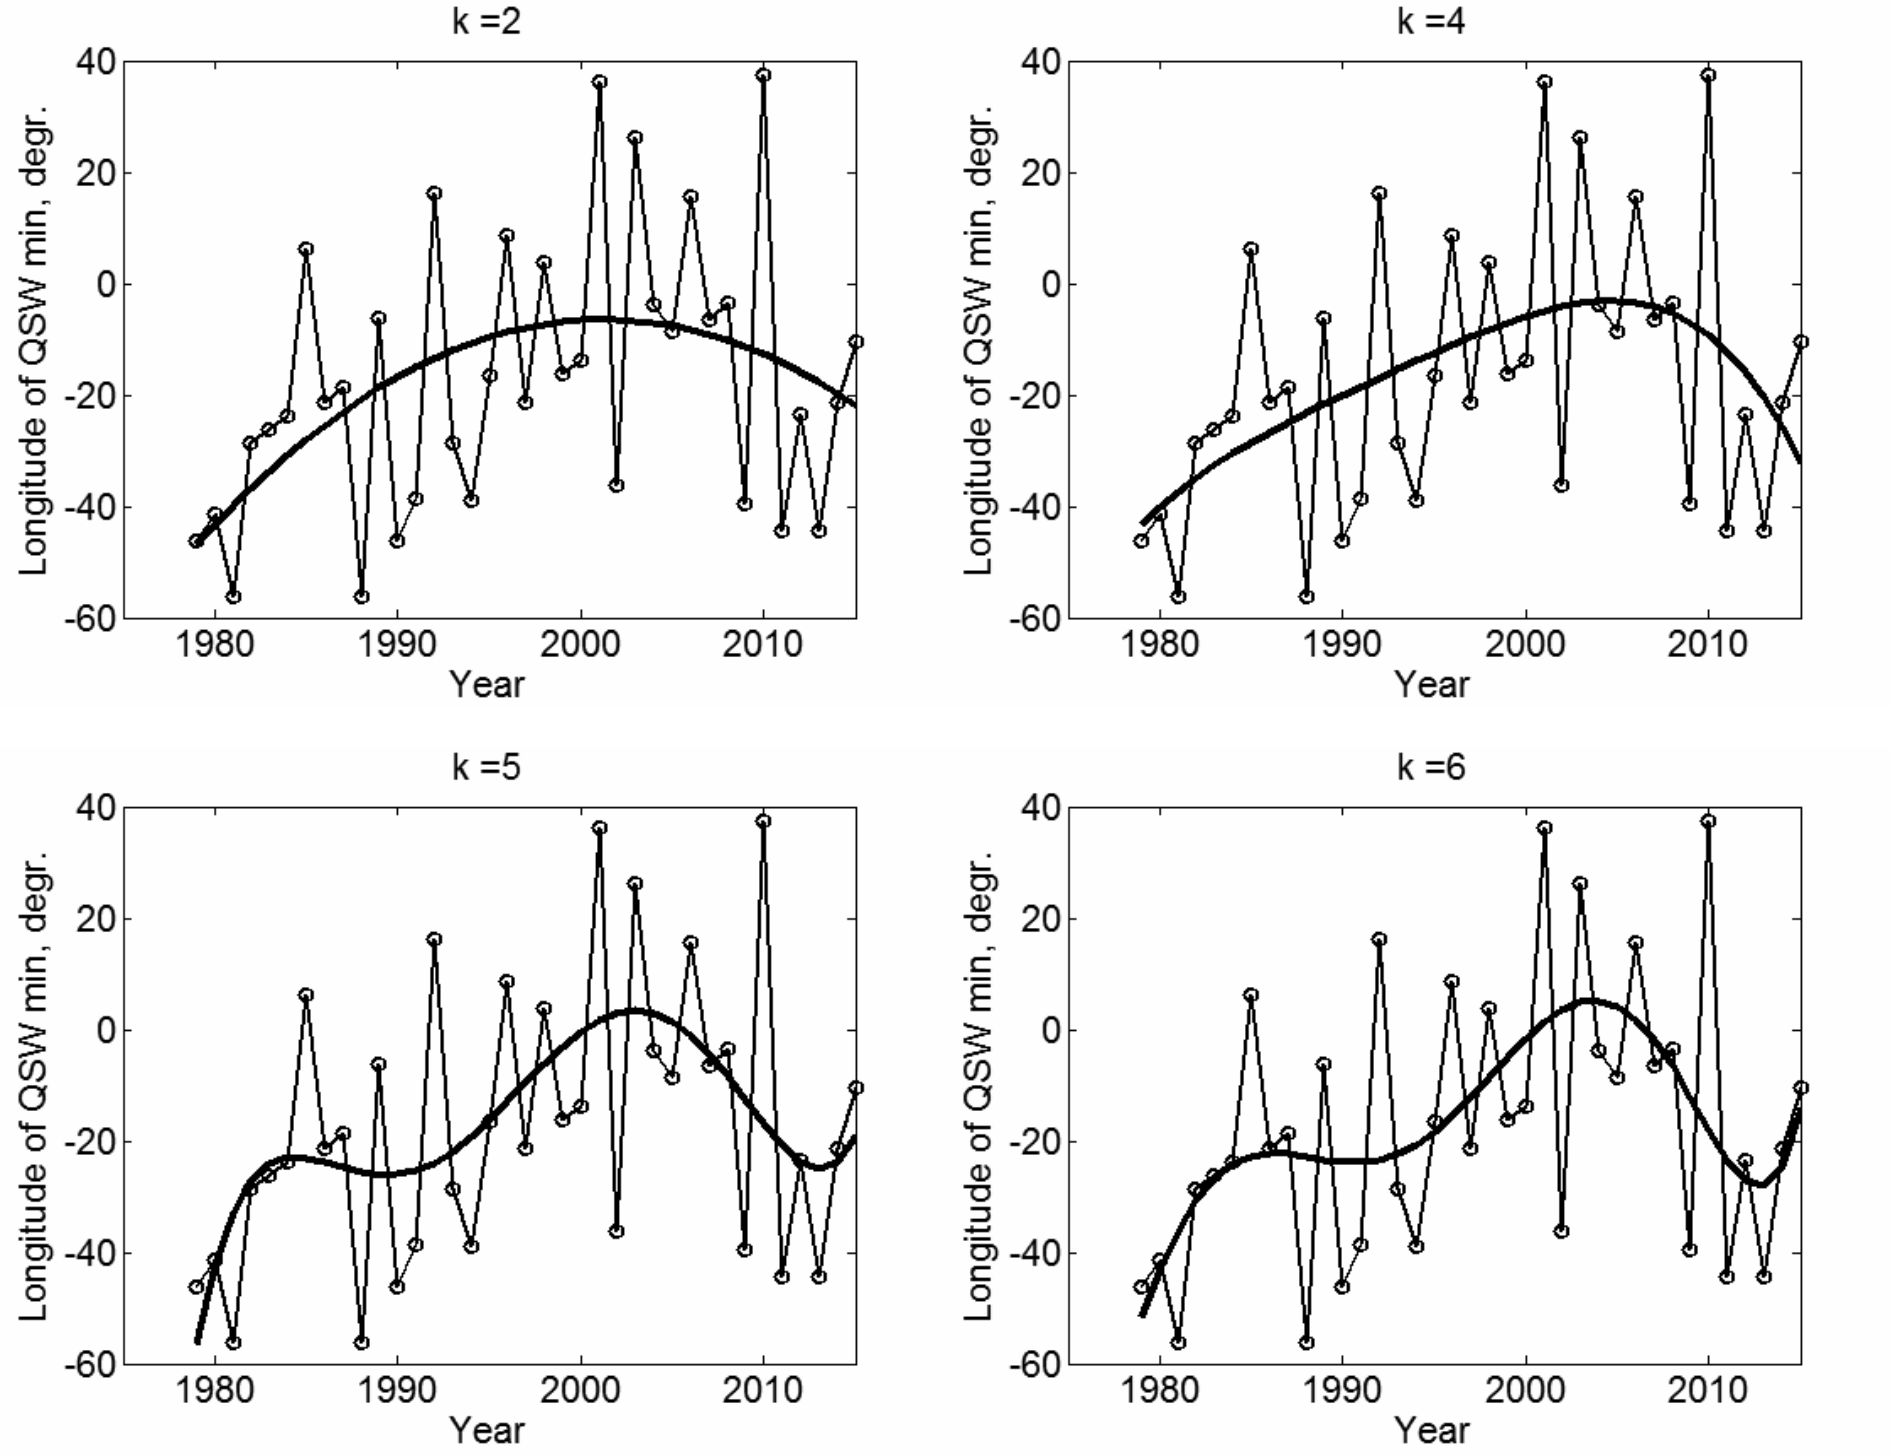

Supplement: Supplementary file 1 [file acp-17-1741-2017-supplement.zip › fs01.tif]
